# Supplementary material for: Suppressed electron hopping in a Au nanoparticle/H2S system: development towards a H2S nanosensor
Source: Royal Society of Chemistry journal article supplement (doi:10.1039/b418559e), 2005-01-01
Supplement: b418559e.pdf [file b418559e.pdf]

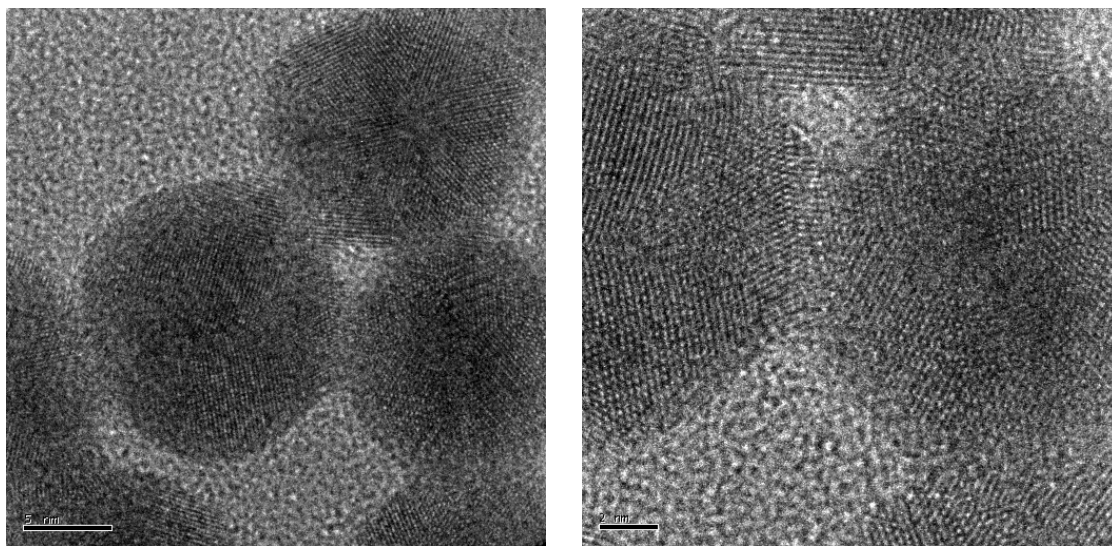

**Supplementary information:**

**Fig. 4** HRTEM images of the H<sub>2</sub>S-treated Au nanoparticles. The left image shows the 12-14 nm Au nanocrystals. The right image shows the same area of particles at higher magnification. The atomic resolution images show no evidence with respect to the structural change in the bulk Au nanocrystals following the H<sub>2</sub>S adsorption, indicating that the chemical adsorption is only a surface phenomenon. The sample for the HRTEM observation was prepared by depositing the Au nanoparticles directly onto a TEM grid with a SiO<sub>2</sub> membrane, following the same procedure and at same conditions as those described in the deposition of the nanoparticles onto the electronic device (see paper text for details).
